# Supplementary material for: Revealing composition and structure dependent deep-level defect in antimony trisulfide photovoltaics
Source: PubMed Central journal article supplement (PMC8166839; doi:10.1038/s41467-021-23592-0), 2021-05-31
Supplement: 41467_2021_23592_MOESM1_ESM.pdf [file 41467_2021_23592_MOESM1_ESM.pdf]

# Supplementary Information

## Revealing composition and structure dependent deep-level defect in antimony trisulfide photovoltaics

Weitao Lian<sup>1,2</sup> Chenhui Jiang<sup>1,2</sup>, Yiwei Yin<sup>1</sup>, Rongfeng Tang<sup>1</sup>, Gang Li<sup>1</sup>, Lijian Zhang<sup>1</sup>, Bo Che<sup>1</sup> and Tao Chen<sup>1,2\*</sup>

<sup>1</sup>Hefei National Laboratory for Physical Sciences at Microscale, CAS Key Laboratory of Materials for Energy Conversion, Department of Materials Science and Engineering, School of Chemistry and Materials Science, University of Science and Technology of China, Hefei, Anhui 230026, P. R. China

<sup>2</sup>Institute of Energy, Hefei Comprehensive National Science Center, Hefei, China

\*E-mail: tchenmse@ustc.edu.cn

Supplementary Table 1 Characterisation of the element composition of Sb-rich and S-rich films deposited on soda-lime glass via energy dispersive X-ray spectroscopy (EDS).

| Films   | Sb at% | S at% | S/Sb | S/Sb (average) |
|---------|--------|-------|------|----------------|
|         | 43.70  | 56.30 | 1.29 |                |
|         | 43.90  | 56.10 | 1.28 |                |
| Sb-rich | 43.30  | 55.90 | 1.29 | 1.28           |
|         | 43.80  | 56.20 | 1.28 |                |
|         | 44.10  | 55.90 | 1.27 |                |
|         | 38.40  | 61.60 | 1.60 |                |
|         | 39.80  | 60.20 | 1.51 |                |
| S-rich  | 38.20  | 61.80 | 1.62 | 1.55           |
|         | 39.90  | 60.10 | 1.51 |                |
|         | 39.80  | 60.20 | 1.51 |                |

Supplementary Table 2 Fitting results of TAS monitored at 545 nm wavelength.

| Films   | $A_1$ | $t_1(\text{ns})$ | $A_2$ | $t_2(\text{ns})$ | $\tau(\text{ns})$ |
|---------|-------|------------------|-------|------------------|-------------------|
| Sb-rich | 0.40  | 0.31             | 0.60  | 3.99             | 3.8               |
| S-rich  | 0.09  | 0.38             | 0.91  | 18.69            | 18.7              |

Supplementary Table 3 Photovoltaic parameters of optimal Sb-rich and S-rich  $\text{Sb}_2\text{S}_3$  devices.

| Devices | $V_{oc}$ (V) | $J_{sc}$ ( $\text{mA}\cdot\text{cm}^{-2}$ ) | $FF$  | $\eta$ (%) | $R_s$ ( $\Omega$ ) | $R_{sh}$ ( $\Omega$ ) |
|---------|--------------|---------------------------------------------|-------|------------|--------------------|-----------------------|
| S-rich  | 0.74*        | 15.6                                        | 52.9  | 6.1        | 106.3              | 6184.6                |
|         | 0.72         | 15.9*                                       | 54.3* | 6.2*       | 100.4              | 6677.5                |
| Sb-rich | 0.68         | 15.4                                        | 47.6  | 5.0        | 116.5              | 1509.3                |

(\* indicates the champion parameters.)

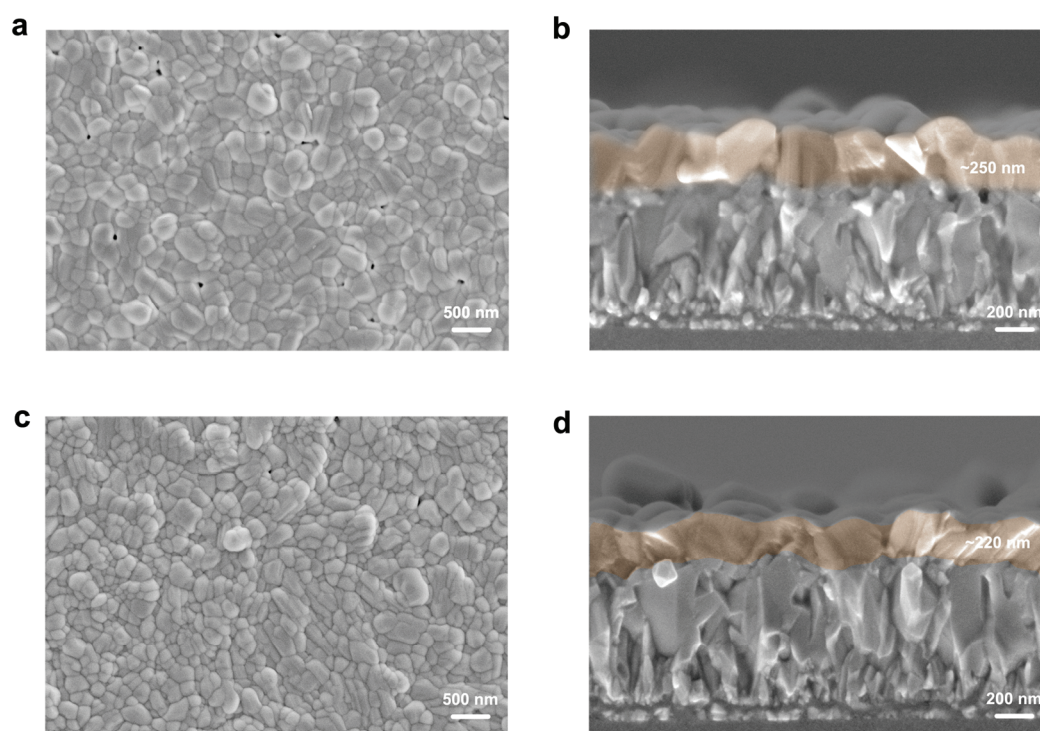

Supplementary Fig. 1 Films morphology characterizations. **a, b**, Surface and cross sectional morphology of Sb-rich  $\text{Sb}_2\text{S}_3$  film. **c, d**, Surface and cross-sectional morphology of S-rich  $\text{Sb}_2\text{S}_3$  film.

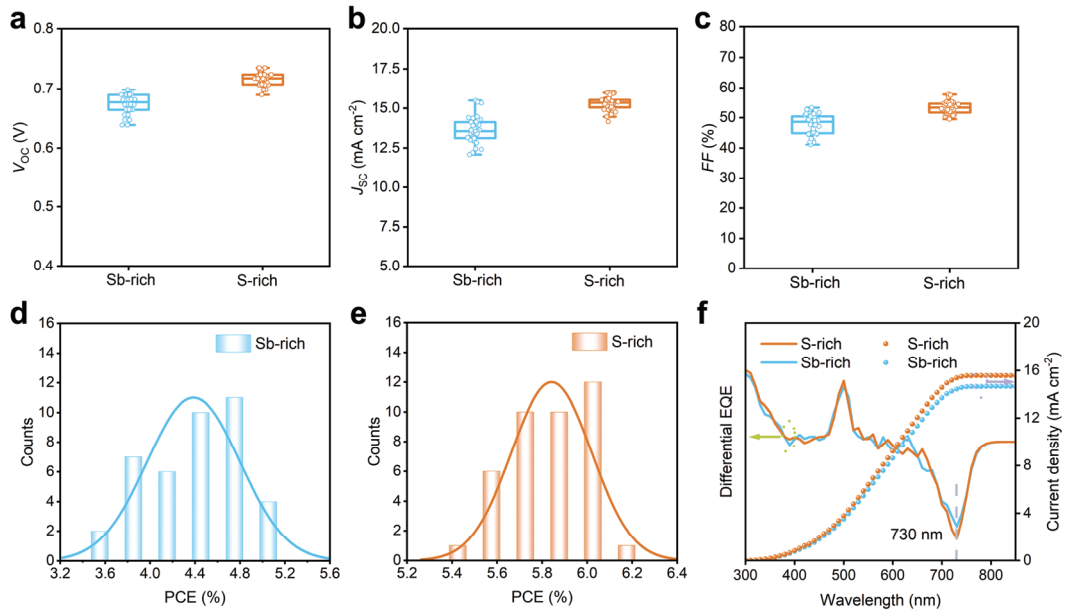

Supplementary Fig. 2 Device photovoltaic performance characterizations. **a-c**, Statistical  $V_{OC}$ ,  $J_{SC}$  and  $FF$  based on 40 individually fabricated Sb-rich and S-rich  $Sb_2S_3$  devices. **d, e**, Statistical PCE distribution of 40 Sb-rich and S-rich  $Sb_2S_3$  devices. **f** Differential EQE and integral current density of optimal Sb-rich and S-rich  $Sb_2S_3$  based solar cells.

### Supplementary note 1. Ultraviolet photoelectron spectroscopy.

To investigate the dependence of stoichiometry on the work function (Fermi level,  $E_F$ ) and band structure of  $Sb_2S_3$  films, we carried out ultraviolet photoelectron spectroscopy (UPS) characterizations. According to the secondary electron cutoff (SEC) and valence band (VB) position (Supplementary Fig. 3a and b), the  $E_F$  is calculated as -3.95 eV and -4.12 eV, respectively for Sb-rich and S-rich  $Sb_2S_3$ . Furthermore, we find that Sb-rich and S-rich  $Sb_2S_3$  share an identical band gap of 1.70 eV corresponding to 730 nm absorption onset (Supplementary Fig. 2f). Hence, the CBM and VBM are determined to be -3.39 and -5.09 eV for S-rich  $Sb_2S_3$ . The CBM and VBM of Sb-rich  $Sb_2S_3$  film

are -3.40 and -5.10 eV, respectively. Particularly, it is noted that the introduction of S has no impacts on the band structure and band gap but  $E_F$  solely. Regarding the downshift of  $E_F$ , we attribute it to some reduced shallow donor dopants accompanying with S addition<sup>1</sup>. Specially, it is worth noting that the S-rich  $\text{Sb}_2\text{S}_3$  is still an n type semiconductor even if the  $E_F$  shift downward a little after S supplement.

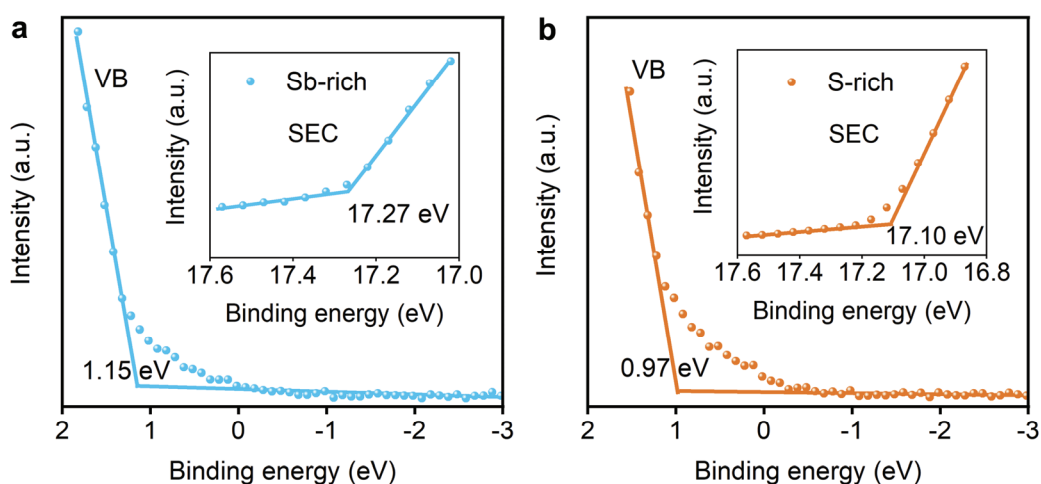

Supplementary Fig. 3 Band structure characterizations. **a, b**, Secondary electron (SEC) cutoff edge and valence band (VB) position of Sb-rich and S-rich  $\text{Sb}_2\text{S}_3$  films.

### Supplementary note 2. DLTS measurement background.

We conduct deep-level transient spectroscopy (DLTS) to detect the deep-level defects properties. The defect level is identified from DLTS signal using Fourier deconvolution algorithm, and Arrhenius plots obtained from defect peaks in DLTS signal are shown in Supplementary Fig. 4. The active energy ( $E_a$ ,  $E_C - E_T$  or  $E_T - E_V$ ) and capture cross section of electron traps and hole traps can be calculated by the Arrhenius equations (1) and (2)<sup>2</sup>,

$$\ln(\tau_e v_{th,n} N_C) = \frac{E_C - E_T}{k_B T} - \ln(X_n \sigma_n), \quad (1)$$

$$\ln(\tau_e v_{th,p} N_V) = \frac{E_T - E_V}{k_B T} - \ln(X_p \sigma_p). \quad (2)$$

where  $\tau_e$ ,  $N_C$ ,  $N_V$ ,  $E_C$ ,  $E_T$  and  $E_V$  are emission time constant, conduction band state density, valence band state density, conduction band, trap energy level and valence band, respectively.  $v_{th,n/p}$ ,  $X_{n/p}$  and  $\sigma_{n/p}$  represent thermal velocity, entropy factor and capture cross section for electron and hole, respectively. Hence, the  $E_a$  and  $\sigma$  can be extracted by the slope and y-axis intercept, separately. In addition, the trap density ( $N_T$ ) could be obtained by equation (3)<sup>2</sup>,

$$N_T = 2N_S \frac{\Delta C}{C_R}. \quad (3)$$

where  $N_S$  is the shallow donor concentration,  $C_R$  is the capacitance under reverse bias, while  $\Delta C$  represents the amplitude of transient capacitance.

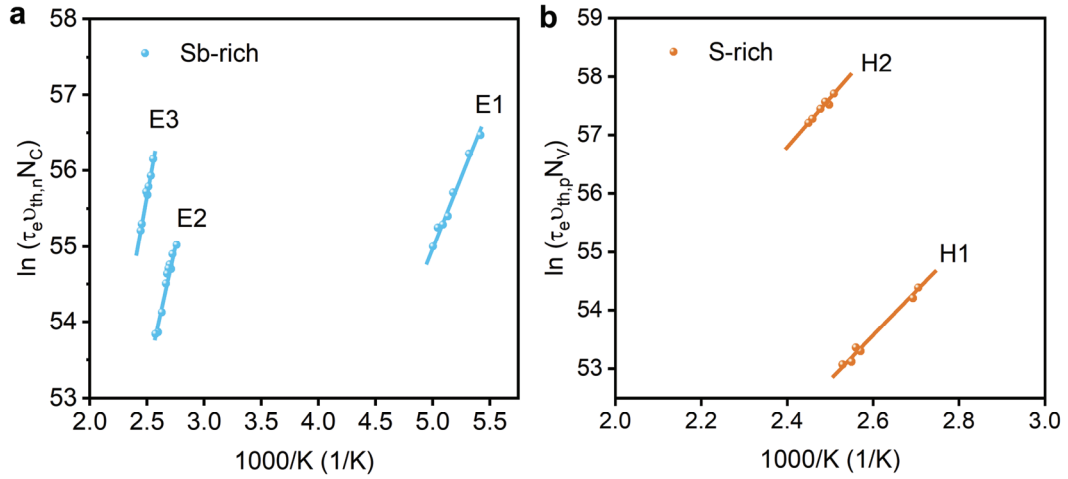

Supplementary Fig. 4 Arrhenius plots obtained from DLTS for Sb-rich (a) and S-rich (b)  $Sb_2S_3$ .

### Supplementary note 3. O<sub>2</sub> post-treatment.

To extensively study the influence of low-density oxygen, we adopted O<sub>2</sub> post-treatment for Sb<sub>2</sub>S<sub>3</sub> film deposited by thermal evaporation. The as-deposited Sb<sub>2</sub>S<sub>3</sub> film was firstly annealed in glovebox as the details described in Methods section (denote as-prepared), then it was placed into a tube furnace to heat at 200 °C for 20, 40 and 60 min in an O<sub>2</sub>/Ar (v/v 5%) mixed atmosphere further with a flux of 60 sccm. The heating rate was set as 18 °C per minute, and sample was cooled down to ambient temperature naturally after O<sub>2</sub> post-treatment.

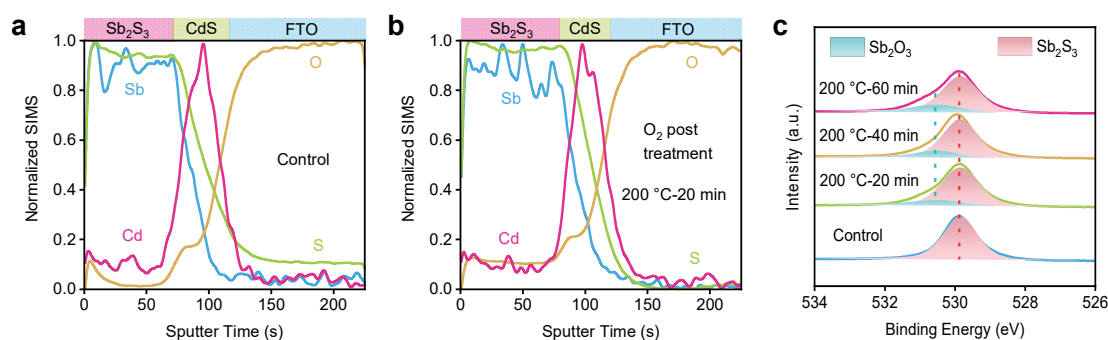

Supplementary Fig. 5 Secondary ion mass spectroscopy (SIMS) and XPS spectra. **a, b**, SIMS of the as-prepared Sb-rich Sb<sub>2</sub>S<sub>3</sub> sample (Control) and annealed in O<sub>2</sub>/Ar (v/v 5%) at 200 °C for 20 min, respectively. **c** XPS spectra of the as-prepared Sb-rich Sb<sub>2</sub>S<sub>3</sub> sample and annealed in O<sub>2</sub>/Ar (v/v 5%) at 200 °C for 20-60 min.

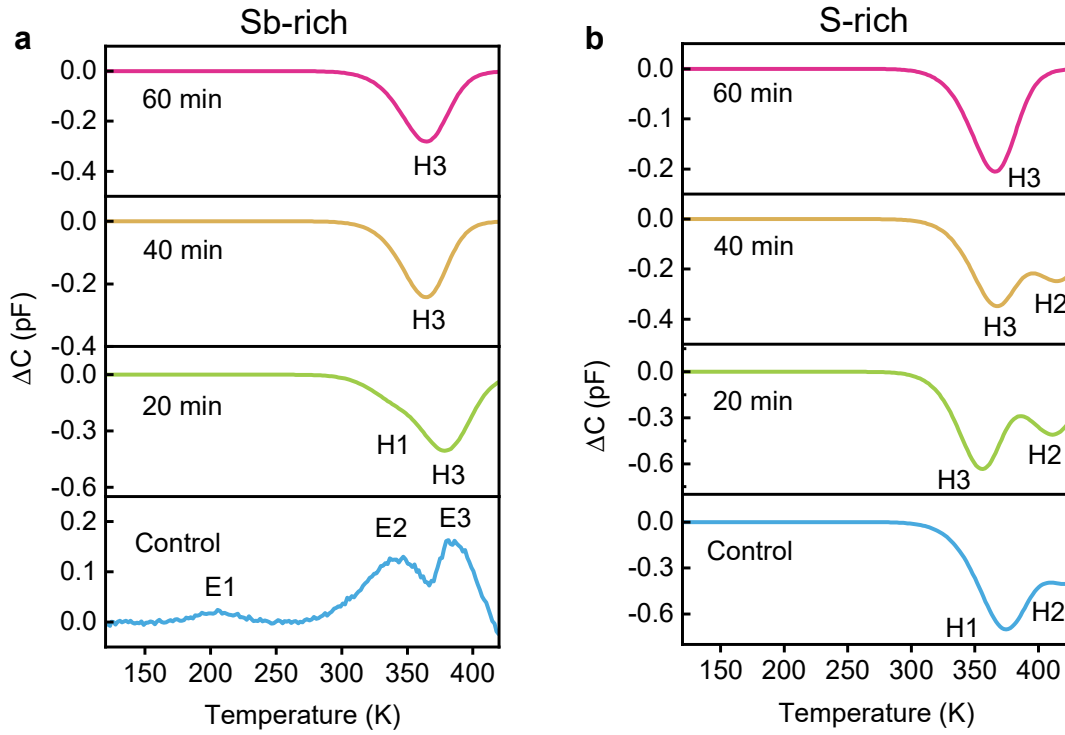

Supplementary Fig. 6 DLTS characterizations. **a**, DLTS characterizations of as-prepared Sb-rich  $\text{Sb}_2\text{S}_3$  film (denoted as Control) and annealed in  $\text{O}_2/\text{Ar}$  (v/v 5%) at 200 °C for 20-60 min. **b**, DLTS characterizations of as-prepared S-rich  $\text{Sb}_2\text{S}_3$  film (Control) and annealed in  $\text{O}_2/\text{Ar}$  (v/v 5%) at 200 °C for 20-60 min. The reverse bias, pulse voltage, double pulse (electric & optical) width and period width of DLTS were set as -0.3 V, 0.5 V, 10 ms and 100 ms, respectively.



Supplementary Table 4 The  $E_T$ ,  $\sigma$  and  $N_T$  and  $N_S$  extracted from DLTS measurement of as-prepared Sb-rich  $Sb_2S_3$  film (denoted as Control) and annealed in  $O_2/Ar$  (v/v 5%) at 200 °C for 20-60 min.

| <b>Sb-rich <math>Sb_2S_3</math></b> | <b>Trap</b> | <b><math>E_T</math> (eV)</b> | <b><math>\sigma</math> (cm<sup>2</sup>)</b> | <b><math>N_T</math> (cm<sup>-3</sup>)</b> | <b><math>N_S</math> (cm<sup>-3</sup>)</b> |                       |
|-------------------------------------|-------------|------------------------------|---------------------------------------------|-------------------------------------------|-------------------------------------------|-----------------------|
| <b>Control</b>                      | E1          | $E_C-0.291$                  | $2.19 \times 10^{-17}$                      | $6.07 \times 10^{13}$                     | $5.00 \times 10^{16}$                     |                       |
|                                     | E2          | $E_C-0.621$                  | $6.10 \times 10^{-16}$                      | $4.24 \times 10^{14}$                     | $5.00 \times 10^{16}$                     |                       |
|                                     | E3          | $E_C-0.709$                  | $2.00 \times 10^{-15}$                      | $6.79 \times 10^{14}$                     | $5.00 \times 10^{16}$                     |                       |
| <b>O<sub>2</sub> post-treatment</b> | 20 min      | H1                           | $E_V+0.612$                                 | $3.14 \times 10^{-16}$                    | $2.86 \times 10^{14}$                     | $2.94 \times 10^{16}$ |
|                                     |             | H3                           | $E_V+0.674$                                 | $1.20 \times 10^{-16}$                    | $8.32 \times 10^{14}$                     | $2.94 \times 10^{16}$ |
|                                     | 40 min      | H3                           | $E_V+0.682$                                 | $8.45 \times 10^{-16}$                    | $1.53 \times 10^{14}$                     | $2.63 \times 10^{16}$ |
|                                     | 60 min      | H3                           | $E_V+0.661$                                 | $2.37 \times 10^{-16}$                    | $3.29 \times 10^{14}$                     | $3.58 \times 10^{16}$ |

Supplementary Table 5 The  $E_T$ ,  $\sigma$  and  $N_T$  and  $N_S$  extracted from DLTS measurement of as-prepared S-rich  $Sb_2S_3$  film (denoted as Control) and annealed in  $O_2/Ar$  (v/v 5%) at 200 °C for 20-60 min.

| <b>S-rich <math>Sb_2S_3</math></b>  | <b>Trap</b> | <b><math>E_T</math> (eV)</b> | <b><math>\sigma</math> (cm<sup>2</sup>)</b> | <b><math>N_T</math> (cm<sup>-3</sup>)</b> | <b><math>N_S</math> (cm<sup>-3</sup>)</b> |                       |
|-------------------------------------|-------------|------------------------------|---------------------------------------------|-------------------------------------------|-------------------------------------------|-----------------------|
| <b>Control</b>                      | H1          | $E_V+0.625$                  | $4.60 \times 10^{-17}$                      | $1.42 \times 10^{15}$                     | $4.54 \times 10^{16}$                     |                       |
|                                     | H2          | $E_V+0.759$                  | $1.40 \times 10^{-16}$                      | $8.32 \times 10^{14}$                     | $4.54 \times 10^{16}$                     |                       |
|                                     | 20 min      | H2                           | $E_V+0.753$                                 | $2.23 \times 10^{-16}$                    | $5.88 \times 10^{14}$                     | $2.67 \times 10^{16}$ |
| <b>O<sub>2</sub> post-treatment</b> |             | H3                           | $E_V+0.661$                                 | $4.41 \times 10^{-16}$                    | $8.72 \times 10^{14}$                     | $2.67 \times 10^{16}$ |
|                                     | 40 min      | H2                           | $E_V+0.730$                                 | $9.22 \times 10^{-17}$                    | $2.54 \times 10^{14}$                     | $2.15 \times 10^{16}$ |
|                                     |             | H3                           | $E_V+0.669$                                 | $2.86 \times 10^{-16}$                    | $3.33 \times 10^{14}$                     | $2.15 \times 10^{16}$ |
|                                     | 60 min      | H3                           | $E_V+0.668$                                 | $7.70 \times 10^{-16}$                    | $3.43 \times 10^{14}$                     | $4.62 \times 10^{16}$ |

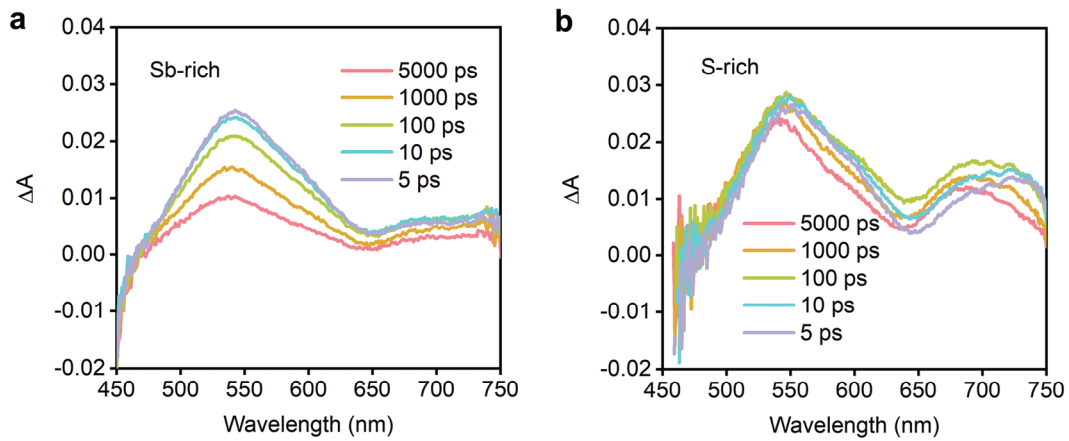

Supplementary Fig. 7 Carrier transport kinetics. **a, b**, TAS for Sb-rich and S-rich  $\text{Sb}_2\text{S}_3$  films on soda-lime glass tracked at 5, 10, 100, 1000 and 5000 ps after pulsed excitation at 400 nm.

### Supplementary reference.

1. Yin, Y. et al. Composition engineering of  $\text{Sb}_2\text{S}_3$  film enabling high performance solar cells. *Sci. Bull.* **64**, 136-141 (2019).
2. Lang, D. Deep-level transient spectroscopy: A new method to characterize traps in semiconductors. *J. Appl. Phys.* **45**, 3023-3032 (1974).
