# Supplementary material for: Revealing composition and structure dependent deep-level defect in antimony trisulfide photovoltaics
Source: PubMed Central journal article supplement (PMC8166839; doi:10.1038/s41467-021-23592-0), 2021-05-31
Supplement: 41467_2021_23592_MOESM2_ESM.pdf [file 41467_2021_23592_MOESM2_ESM.pdf]

## Solar Cells Reporting Summary

Nature Research wishes to improve the reproducibility of the work that we publish. This form is intended for publication with all accepted papers reporting the characterization of photovoltaic devices and provides structure for consistency and transparency in reporting. Some list items might not apply to an individual manuscript, but all fields must be completed for clarity.

For further information on Nature Research policies, including our [data availability policy](#), see [Authors & Referees](#).

## ► Experimental design

## Please check: are the following details reported in the manuscript?

## 1. Dimensions

- Area of the tested solar cells  Yes  No The area of tested solar cells is 0.12 cm<sup>2</sup> (described in Methods, fabrication of Sb2S<sub>3</sub> solar cells)
- Method used to determine the device area  Yes  No The active area was determined by the mask

## 2. Current-voltage characterization

- Current density-voltage (J-V) plots in both forward and backward direction  Yes  No No current density-voltage plots in forward direction, since it is not the subject of the article
- Voltage scan conditions  Yes  No J-V curves were measured by reverse scan (0.75 V to -0.1 V) with a scanning rate of 32mV/s (voltage step of 10 mV) (Figure 3c, and Device Characterizations)  
*For instance: scan direction, speed, dwell times*
- Test environment  Yes  No Performance measurements were tested in air ambient environments under room temperature (Methods)  
*For instance: characterization temperature, in air or in glove box*
- Protocol for preconditioning of the device before its characterization  Yes  No No preconditioning was used before its characterization
- Stability of the J-V characteristic  Yes  No The stability of the J-V characteristics is not shown in this manuscript.  
*Verified with time evolution of the maximum power point or with the photocurrent at maximum power point; see ref. 7 for details.*

## 3. Hysteresis or any other unusual behaviour

- Description of the unusual behaviour observed during the characterization  Yes  No No measurements of hysteresis behaviour in this report, since it is not the subject of the article.
- Related experimental data  Yes  No No related experimental data in this manuscripts.

## 4. Efficiency

- External quantum efficiency (EQE) or incident photons to current efficiency (IPCE)  Yes  No The EQE was shown in Figure 3d
- A comparison between the integrated response under the standard reference spectrum and the response measure under the simulator  Yes  No The integrated J<sub>sc</sub> from EQE spectra agree well with the J<sub>sc</sub> from J-V measurements (Figure 3c and Supplementary Figure 2f)
- For tandem solar cells, the bias illumination and bias voltage used for each subcell  Yes  No No tandem cells reported in this manuscript

## 5. Calibration

- Light source and reference cell or sensor used for the characterization  Yes  No A standard xenon-lamp-based solar simulator (Oriel Sol 3A, Japan) is used for the measurements (Methods, Devices Characterizations)
- Confirmation that the reference cell was calibrated and certified  Yes  No The solar simulator illumination intensity was calibrated by a monocrystalline silicon reference cell (Oriel P/N 91150 V, with KG-5 visible color filter) calibrated by the National Renewable Energy Laboratory (NREL) (Methods, Devices Characterizations)

|                                                                                                                                                                                               |                                                                        |                                                                                                            |
|-----------------------------------------------------------------------------------------------------------------------------------------------------------------------------------------------|------------------------------------------------------------------------|------------------------------------------------------------------------------------------------------------|
| Calculation of spectral mismatch between the reference cell and the devices under test                                                                                                        | <input checked="" type="checkbox"/> Yes<br><input type="checkbox"/> No | Mismatch factor of 1 was used in our measurements                                                          |
| <b>6. Mask/aperture</b>                                                                                                                                                                       |                                                                        |                                                                                                            |
| Size of the mask/aperture used during testing                                                                                                                                                 | <input checked="" type="checkbox"/> Yes<br><input type="checkbox"/> No | The size of the mask is 0.12 cm <sup>2</sup> (Methods)                                                     |
| Variation of the measured short-circuit current density with the mask/aperture area                                                                                                           | <input type="checkbox"/> Yes<br><input checked="" type="checkbox"/> No | No measurement of the device with different the mask/aperture area was conducted                           |
| <b>7. Performance certification</b>                                                                                                                                                           |                                                                        |                                                                                                            |
| Identity of the independent certification laboratory that confirmed the photovoltaic performance                                                                                              | <input type="checkbox"/> Yes<br><input checked="" type="checkbox"/> No | No performance certification was reported in this manuscript                                               |
| A copy of any certificate(s)<br><i>Provide in Supplementary Information</i>                                                                                                                   | <input type="checkbox"/> Yes<br><input checked="" type="checkbox"/> No | No copys of any cerificates in this manuscript                                                             |
| <b>8. Statistics</b>                                                                                                                                                                          |                                                                        |                                                                                                            |
| Number of solar cells tested                                                                                                                                                                  | <input checked="" type="checkbox"/> Yes<br><input type="checkbox"/> No | 40 independently fabricated devices were tested ( Supplementary Figure 2a-e)                               |
| Statistical analysis of the device performance                                                                                                                                                | <input checked="" type="checkbox"/> Yes<br><input type="checkbox"/> No | The statistical analysis of device performance were shown in Supplementary Figure 2a-e                     |
| <b>9. Long-term stability analysis</b>                                                                                                                                                        |                                                                        |                                                                                                            |
| Type of analysis, bias conditions and environmental conditions<br><i>For instance: illumination type, temperature, atmosphere humidity, encapsulation method, preconditioning temperature</i> | <input type="checkbox"/> Yes<br><input checked="" type="checkbox"/> No | No long-term stability measurement reported in this manuscript, since the little relevance to the subject. |
